# Supplementary material for: Assessing volumetric change distributions and scaling relations of retrogressive thaw slumps across the Arctic
Source: Copernicus journal article supplement (doi:10.5194/tc-2021-137), 2021-06-29
Supplement: Supplementary file 1 [file tc-2021-137-supplement.pdf]

# Supplement to Assessing volumetric change distributions and scaling relations of thaw slumps across the Arctic

Philipp Bernhard<sup>1</sup>, Simon Zwieback<sup>2</sup>, Nora Bergner<sup>1</sup>, and Irena Hajsek<sup>1,3</sup>

<sup>1</sup>Institute of Environmental Engineering, ETH Zurich, 8093 Zurich, Switzerland ETH Zürich

<sup>2</sup>Geophysical Institute, University of Alaska Fairbanks, Fairbanks, AK 99775 USA

<sup>3</sup>Microwaves and Radar Institute, German Aerospace Center (DLR) e.V., 82234 Wessling, Germany

**Correspondence:** Philipp Bernhard (bernhard@ifu.baug.ethz.ch)

## 1 Propability density function of area and volumetric change rates

To compute the rollover, cutoff, exponential decay coefficients we fitted a a three-parameter inverse Gamma function defined by:

$$pdf(X_{RTS}|\rho, a, s) = \frac{1}{a\Gamma(\rho)} \left( \frac{1}{X_{RTS} - s} \right)^{\rho+1} \exp\left( -\frac{a}{X_{RTS} - s} \right) \quad (1)$$

- 5 where  $X_{RTS}$  is either the yearly area or volume change and  $\Gamma(\rho)$  is the gamma function of  $\rho$ . The determined values of the fitting parameters as well as the rollover, cutoff and exponential decay coefficients can be seen in Table 1 and 2.

**Table S 1.** Rollover Cutoff and Exponential decay for yearly area change rate.

| Area        | Rollover<br>[10 <sup>3</sup> m <sup>2</sup> yr <sup>-1</sup> ] | Cutoff<br>[10 <sup>3</sup> m <sup>2</sup> yr <sup>-1</sup> ] | Exp.decay | $\rho$ | a<br>[10 <sup>3</sup> ] | s<br>[10 <sup>3</sup> ] |
|-------------|----------------------------------------------------------------|--------------------------------------------------------------|-----------|--------|-------------------------|-------------------------|
| Peel        | 2.53 ± 0.22                                                    | 4.67 ± 2.87                                                  | 2.1 ± 0.2 | 1.35   | 6.90                    | -0.46                   |
| Banks       | 6.51 ± 0.42                                                    | 17.45 ± 6.84                                                 | 2.8 ± 0.4 | 1.87   | 22.86                   | -1.50                   |
| Ellesmere   | 6.66 ± 0.69                                                    | 14.41 ± 7.68                                                 | 2.3 ± 0.3 | 1.47   | 17.17                   | -0.57                   |
| Tuktuyaktuk | 1.47 ± 0.18                                                    | 3.43 ± 2.15                                                  | 2.7 ± 0.5 | 2.39   | 6.97                    | -0.61                   |
| Noatak      | 2.17 ± 0.81                                                    | 3.99 ± 1.81                                                  | 2.1 ± 0.4 | 7.47   | 69.39                   | -5.52                   |
| Chukotka    | 2.33 ± 0.77                                                    | 4.30 ± 1.49                                                  | 2.6 ± 0.5 | 2.39   | 13.01                   | -1.32                   |
| Taymyr      | 2.38 ± 0.34                                                    | 5.42 ± 2.17                                                  | 2.8 ± 0.6 | 1.03   | 3.09                    | 0.75                    |
| Yamal/Gydan | 2.19 ± 0.39                                                    | 4.78 ± 2.33                                                  | 3.0 ± 1.3 | 2.32   | 10.29                   | -0.86                   |

**Table S 2.** Rollover Cutoff and Exponential decay for yearly volumetric change rate.

| Area        | Rollover<br>[10 <sup>3</sup> m <sup>2</sup> yr <sup>-1</sup> ] | Cutoff<br>[10 <sup>3</sup> m <sup>2</sup> yr <sup>-1</sup> ] | Exp.decay | $\rho$ | a<br>[10 <sup>3</sup> ] | s<br>[10 <sup>3</sup> ] |
|-------------|----------------------------------------------------------------|--------------------------------------------------------------|-----------|--------|-------------------------|-------------------------|
| Peel        | 7.68 ± 0.93                                                    | 14.83 ± 6.47                                                 | 1.8 ± 0.1 | 0.92   | 17.99                   | -1.64                   |
| Banks       | 9.70 ± 0.78                                                    | 25.58 ± 11.54                                                | 2.0 ± 0.2 | 1.04   | 22.91                   | -1.54                   |
| Ellesmere   | 16.12 ± 3.00                                                   | 15.71 ± 10.44                                                | 1.8 ± 0.3 | 1.03   | 30.49                   | 0.805                   |
| Tuktuyaktuk | 4.02 ± 0.44                                                    | 5.07 ± 2.17                                                  | 2.0 ± 0.2 | 1.63   | 11.14                   | -0.36                   |
| Noatak      | 3.82 ± 1.52                                                    | 5.48 ± 3.70                                                  | 1.8 ± 0.3 | 0.41   | 1.14                    | 2.04                    |
| Chukotka    | 4.99 ± 2.10                                                    | 8.19 ± 6.10                                                  | 2.1 ± 0.5 | 2.07   | 29.34                   | -3.66                   |
| Taymyr      | 6.22 ± 1.14                                                    | 7.69 ± 6.91                                                  | 2.0 ± 0.4 | 1.26   | 12.13                   | 0.61                    |
| Yamal/Gydan | 4.33 ± 1.64                                                    | 13.92 ± 7.11                                                 | 2.8 ± 1.0 | 3.16   | 44.22                   | -5.77                   |

## 2 Additional Figures

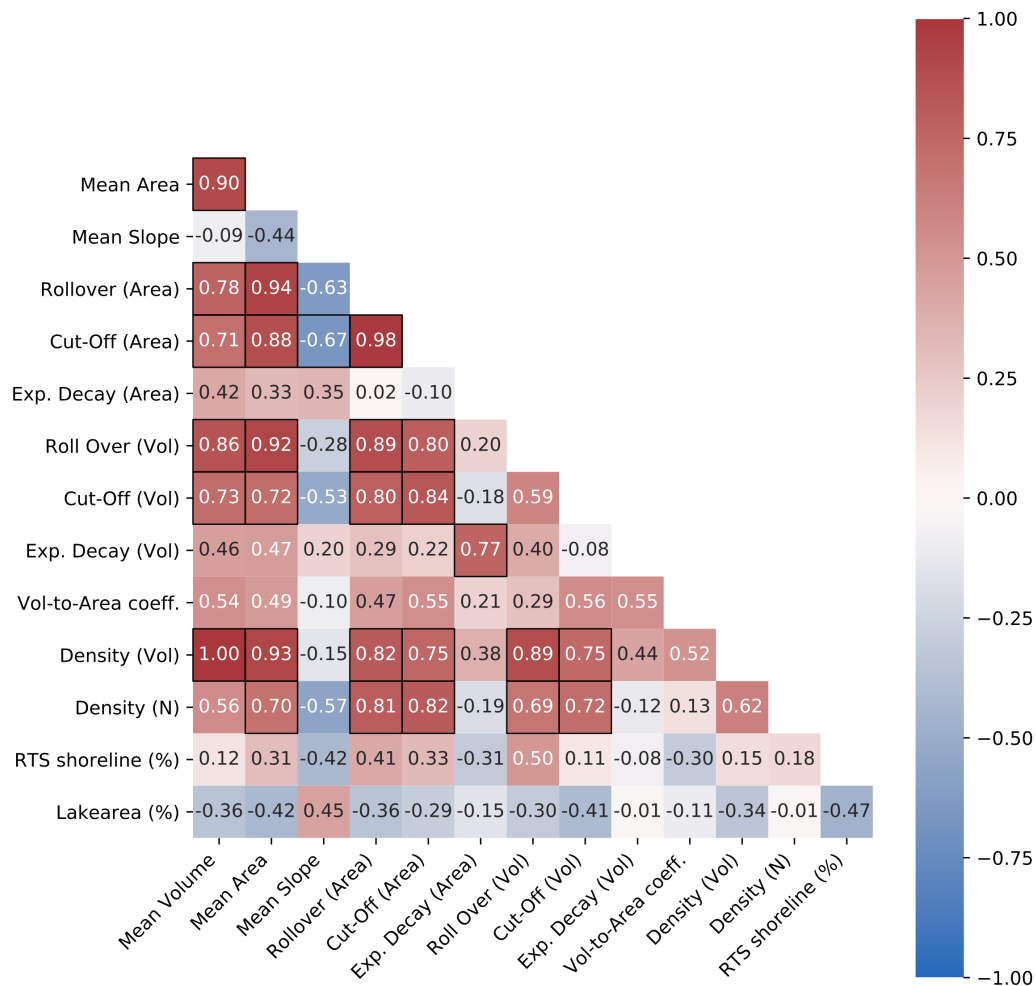

**Figure S 1.** Correlation coefficients between all computed quantities of all areas. A value below -0.64 and above 0.64 are statistically significant (t-Test with a p-value < 0.05).

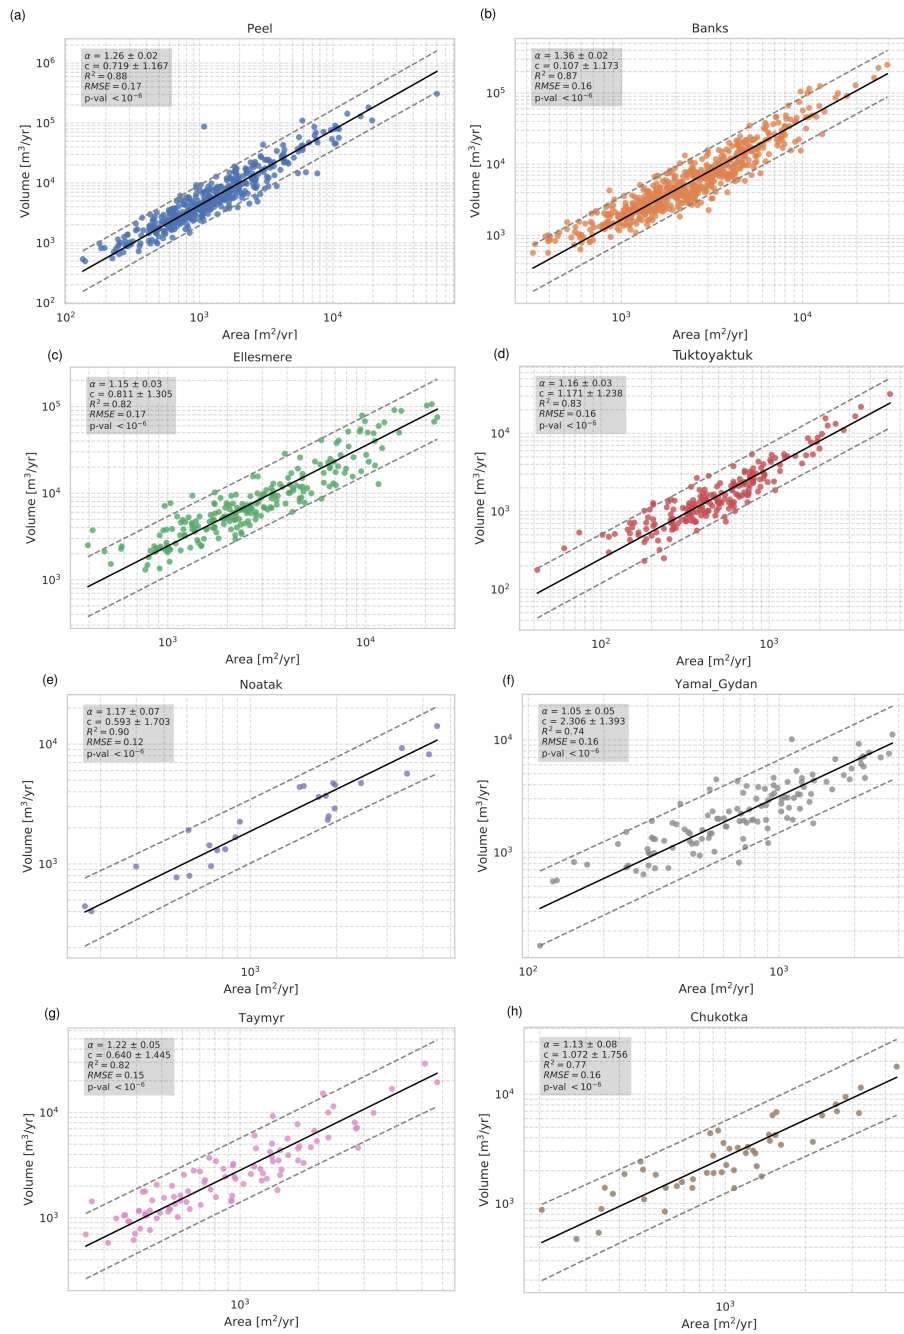

**Figure S 2.** Area to Volume scaling for each study area.

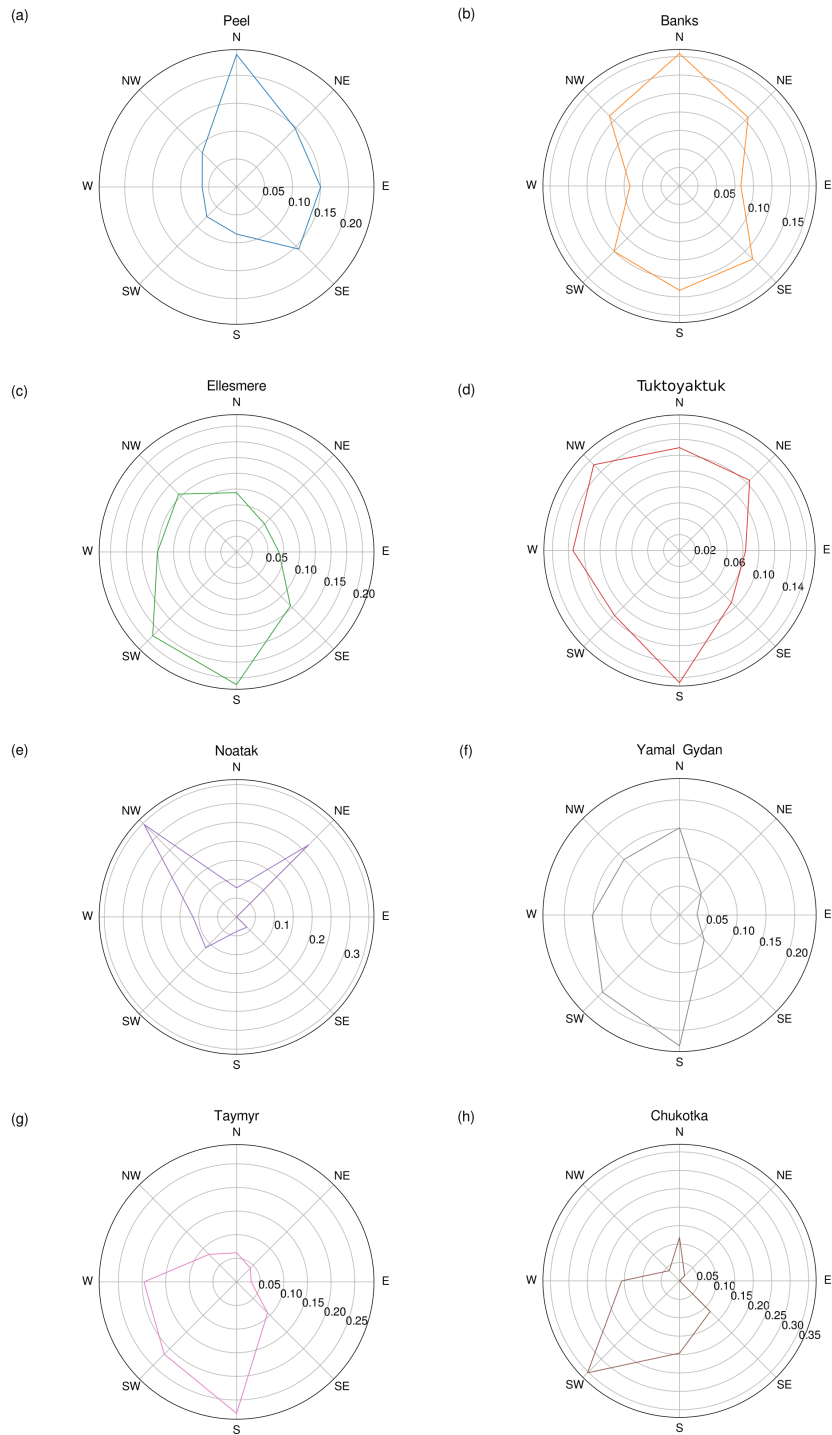

**Figure S 3.** Aspect distribution of all study areas.
