# Supplementary material for: Assessing volumetric change distributions and scaling relations of retrogressive thaw slumps across the Arctic
Source: Copernicus journal article supplement (doi:10.5194/tc-2021-137), 2021-06-29
Supplement: Supplementary file [file tc-2021-137-AC2-supplement.pdf]

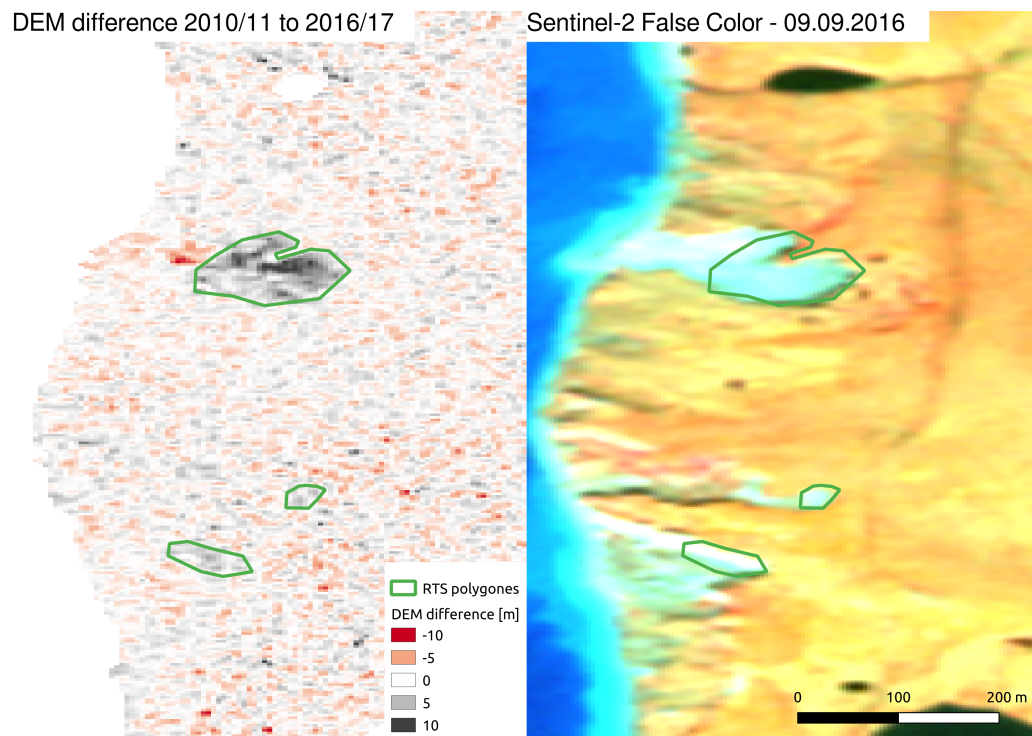

**Figure 1.** Example of RTS polygons in the Chukotka study region located at N65.93 W-178.82. Left: DEM difference image between winter 2010/11 and 2016/17. Right: False color Sentinel-2 image taken on the 09.09.2016.

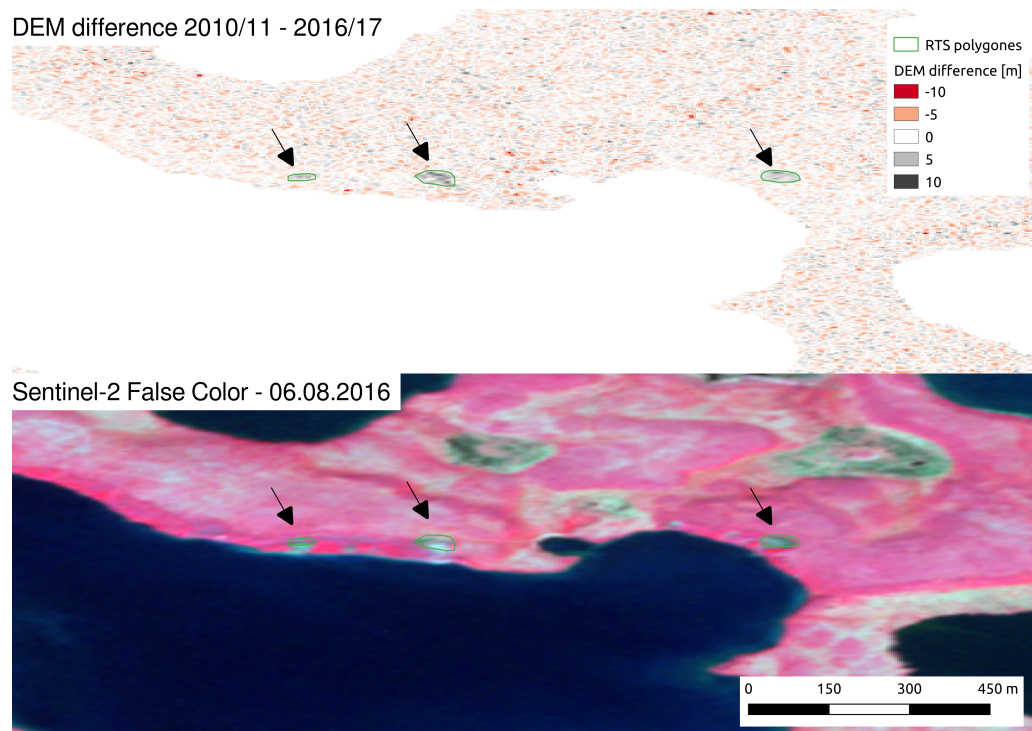

**Figure 2.** Example of RTS polygons in the Tuktoyaktuk study region located at N69.08 W-134.02. The black arrows indicate the RTS locations Left: DEM difference image between winter 2010/11 and 2016/17. Right: False color Sentinel-2 image taken on the 06.08.2016.

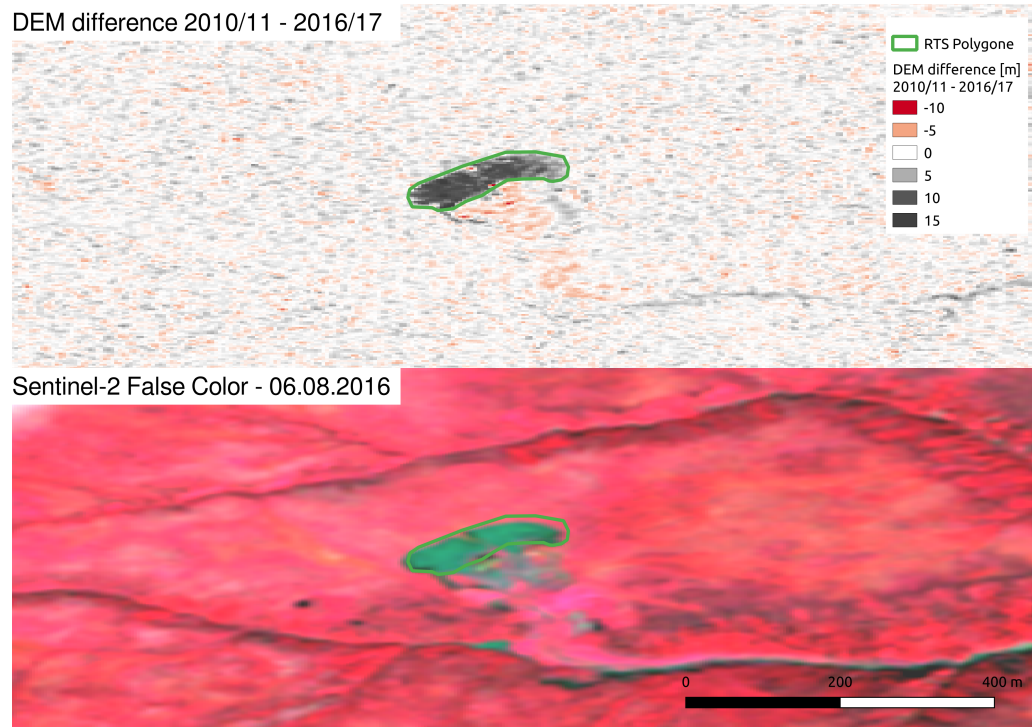

**Figure 3.** Example of RTS polygons in the Peel study region located at N67.26 W-135.27. Left: DEM difference image between winter 2010/11 and 2016/17. Right: False color Sentinel-2 image taken on the 06.08.2016.

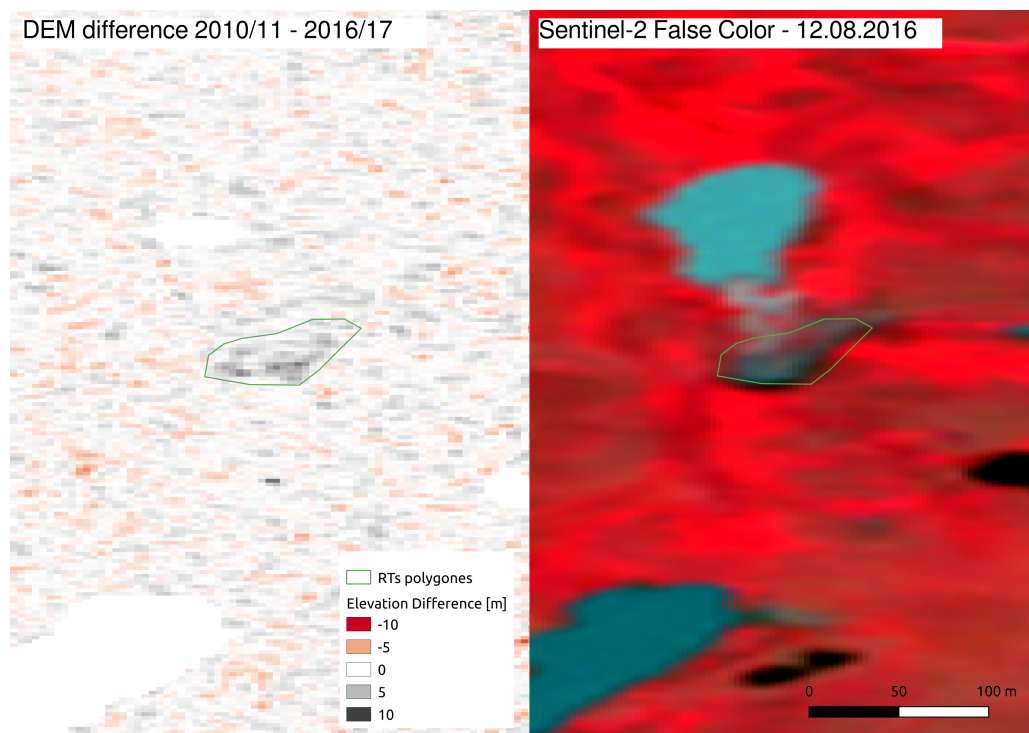

**Figure 4.** Example of RTS polygons in the Yamal study region located at N71.09 W70.40 . Left: DEM difference image between winter 2010/11 and 2016/17. Right: False color Sentinel-2 image taken on the 12.08.2016.
